# Supplementary material for: Suicide fatalities in the US compared to Canada: Potential suicides averted with lower firearm ownership in the US
Source: PLoS One. 2020 Apr 30;15(4):e0232252. doi: 10.1371/journal.pone.0232252 (PMC7192495; doi:10.1371/journal.pone.0232252)
Supplement: S7 Table — (DOCX) [file pone.0232252.s008.docx]

Table S7. Firearm and non-firearm suicide deaths, denominators, and crude rates for the US according to WISQARS,1 by age and sex, 2016, grouped into ethnicity categories to align those provided for the Canadian population.

| **FIREARM SUICIDE** | | | | | | | |
| --- | --- | --- | --- | --- | --- | --- | --- |
|  |  |  | **Ethnicity** | | |  |  |
| **Age Group** | **Sex** |  | **Any Aboriginal origins** | **Any African origins** | **Non-aboriginal, non-African** | **Total firearm suicides** | **Total firearm suicide rates per 100,000** |
| **0 to 14** | **Male** | No. deaths | 3 | 10 | 113 | 126 | 0.4046827 |
|  |  | Population | 585881 | 5196385 | 25353242 | 31135508 |  |
|  | **Female** | No. deaths | 0 | 0 | 34 | 34 | 0.1139427 |
|  |  | Population | 570162 | 5027401 | 24241998 | 29839561 |  |
| **15 to 24** | **Male** | No. deaths | 46 | 305 | 1997 | 2348 | 10.532496 |
|  |  | Population | 389861 | 3688506 | 18214544 | 22292911 |  |
|  | **Female** | No. deaths | 4 | 42 | 289 | 335 | 1.5788395 |
|  |  | Population | 374352 | 3560736 | 17283028 | 21218116 |  |
| **25 to 34** | **Male** | No. deaths | 50 | 341 | 2427 | 2818 | 12.469171 |
|  |  | Population | 374596 | 3338882 | 18886260 | 22599738 |  |
|  | **Female** | No. deaths | 10 | 54 | 416 | 480 | 2.1741587 |
|  |  | Population | 346167 | 3466922 | 18264416 | 22077505 |  |
| **35 to 44** | **Male** | No. deaths | 29 | 171 | 2344 | 2544 | 12.623579 |
|  |  | Population | 309569 | 2702577 | 17140617 | 20152763 |  |
|  | **Female** | No. deaths | 7 | 37 | 511 | 555 | 2.7316497 |
|  |  | Population | 297098 | 3017848 | 17002447 | 20317393 |  |
| **45 to 54** | **Male** | No. deaths | 21 | 135 | 3005 | 3161 | 14.976685 |
|  |  | Population | 277098 | 2666665 | 18162376 | 21106139 |  |
|  | **Female** | No. deaths | 2 | 22 | 688 | 712 | 3.284051 |
|  |  | Population | 277646 | 3018481 | 18384413 | 21680540 |  |
| **55 to 64** | **Male** | No. deaths | 27 | 122 | 3269 | 3418 | 17.090822 |
|  |  | Population | 216738 | 2284809 | 17497491 | 19999038 |  |
|  | **Female** | No. deaths | 4 | 14 | 631 | 649 | 3.0236526 |
|  |  | Population | 235033 | 2712845 | 18516228 | 21464106 |  |
| **65+** | **Male** | No. deaths | 18 | 114 | 5098 | 5230 | 23.998723 |
|  |  | Population | 169296 | 1866064 | 19757466 | 21792826 |  |
|  | **Female** | No. deaths | 2 | 17 | 507 | 526 | 1.9161157 |

Table S7 *continued*. Firearm and non-firearm suicide deaths, denominators, and crude rates for the US according to WISQARS,1 by age and sex, 2016, grouped into ethnicity categories to align with those provided for the Canadian population.

| **NON-FIREARM SUICIDE** | | | | | | | |
| --- | --- | --- | --- | --- | --- | --- | --- |
|  |  |  | **Ethnicity** | | |  |  |
| **Age Group** | **Sex** |  | **Any Aboriginal origins** | **Any African origins** | **Non-aboriginal, non-African** | **Total non-firearm suicides** | **Total non-firearm suicides rates per 100,000** |
| **0 to 14** | **Male** | No. deaths | 4 | 22 | 120 | 146 | 0.468918 |
|  |  | Population | 585881 | 5196385 | 25353242 | 31135508 |  |
|  | **Female** | No. deaths | 6 | 16 | 115 | 137 | 0.45912204 |
|  |  | Population | 570162 | 5027401 | 24241998 | 29839561 |  |
| **15 to 24** | **Male** | No. deaths | 81 | 238 | 1908 | 2227 | 9.98972274 |
|  |  | Population | 389861 | 3688506 | 18214544 | 22292911 |  |
|  | **Female** | No. deaths | 40 | 101 | 672 | 813 | 3.83163142 |
|  |  | Population | 374352 | 3560736 | 17283028 | 21218116 |  |
| **25 to 34** | **Male** | No. deaths | 95 | 289 | 2685 | 3069 | 13.5798034 |
|  |  | Population | 374596 | 3338882 | 18886260 | 22599738 |  |
|  | **Female** | No. deaths | 30 | 78 | 891 | 999 | 4.52496783 |
|  |  | Population | 346167 | 3466922 | 18264416 | 22077505 |  |
| **35 to 44** | **Male** | No. deaths | 56 | 190 | 2504 | 2750 | 13.6457716 |
|  |  | Population | 309569 | 2702577 | 17140617 | 20152763 |  |
|  | **Female** | No. deaths | 22 | 65 | 1094 | 1181 | 5.81275363 |
|  |  | Population | 297098 | 3017848 | 17002447 | 20317393 |  |
| **45 to 54** | **Male** | No. deaths | 31 | 136 | 2870 | 3037 | 14.3891784 |
|  |  | Population | 277098 | 2666665 | 18162376 | 21106139 |  |
|  | **Female** | No. deaths | 10 | 51 | 1466 | 1527 | 7.0431825 |
|  |  | Population | 277646 | 3018481 | 18384413 | 21680540 |  |
| **55 to 64** | **Male** | No. deaths | 19 | 84 | 2224 | 2327 | 11.6355597 |
|  |  | Population | 216738 | 2284809 | 17497491 | 19999038 |  |
|  | **Female** | No. deaths | 5 | 45 | 1315 | 1365 | 6.35945424 |
|  |  | Population | 235033 | 2712845 | 18516228 | 21464106 |  |
| **65+** | **Male** | No. deaths | 2 | 49 | 1473 | 1524 | 6.993127 |
|  |  | Population | 169296 | 1866064 | 19757466 | 21792826 |  |
|  | **Female** | No. deaths | 5 | 22 | 897 | 924 | 3.36595235 |
|  |  | Population | 206658 | 2758899 | 24485812 | 27451369 |  |
